# Supplementary material for: Understanding the promotional effect of 3d transition metals (Fe, Co, Cu) on Pd/TiO2 for H2-SCR
Source: Royal Society of Chemistry journal article supplement (doi:10.1039/d0cy01840f), 2020-11-24
Supplement: d0cy01840f1.pdf [file d0cy01840f1.pdf]

### Supporting information

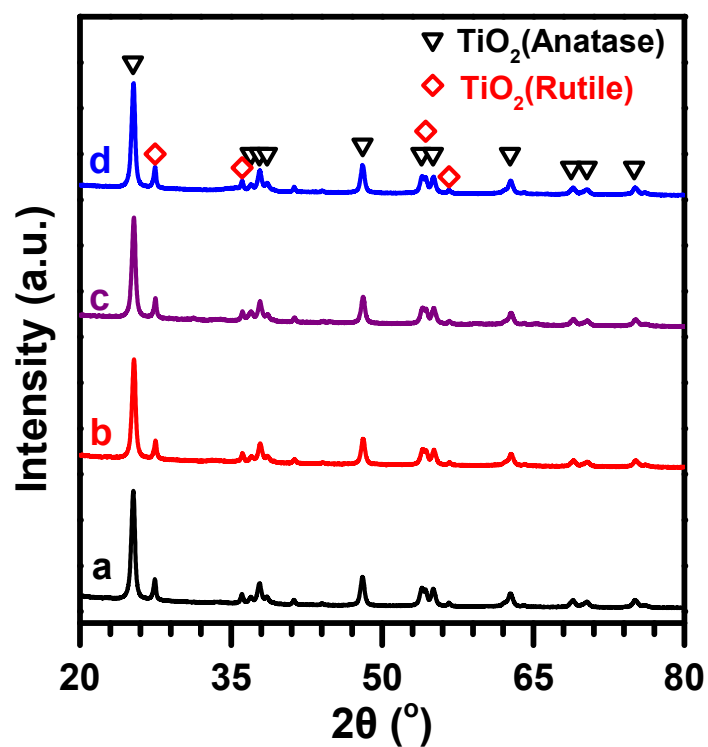

Figure S1. XRD patterns of Pd/TiO<sub>2</sub> and Pd-M/TiO<sub>2</sub> samples, (a) 1Pd/TiO<sub>2</sub>, (b) 1Pd-5Fe/TiO<sub>2</sub>, (c) 1Pd-5Co/TiO<sub>2</sub>, (d) 1Pd-5Cu/TiO<sub>2</sub>.

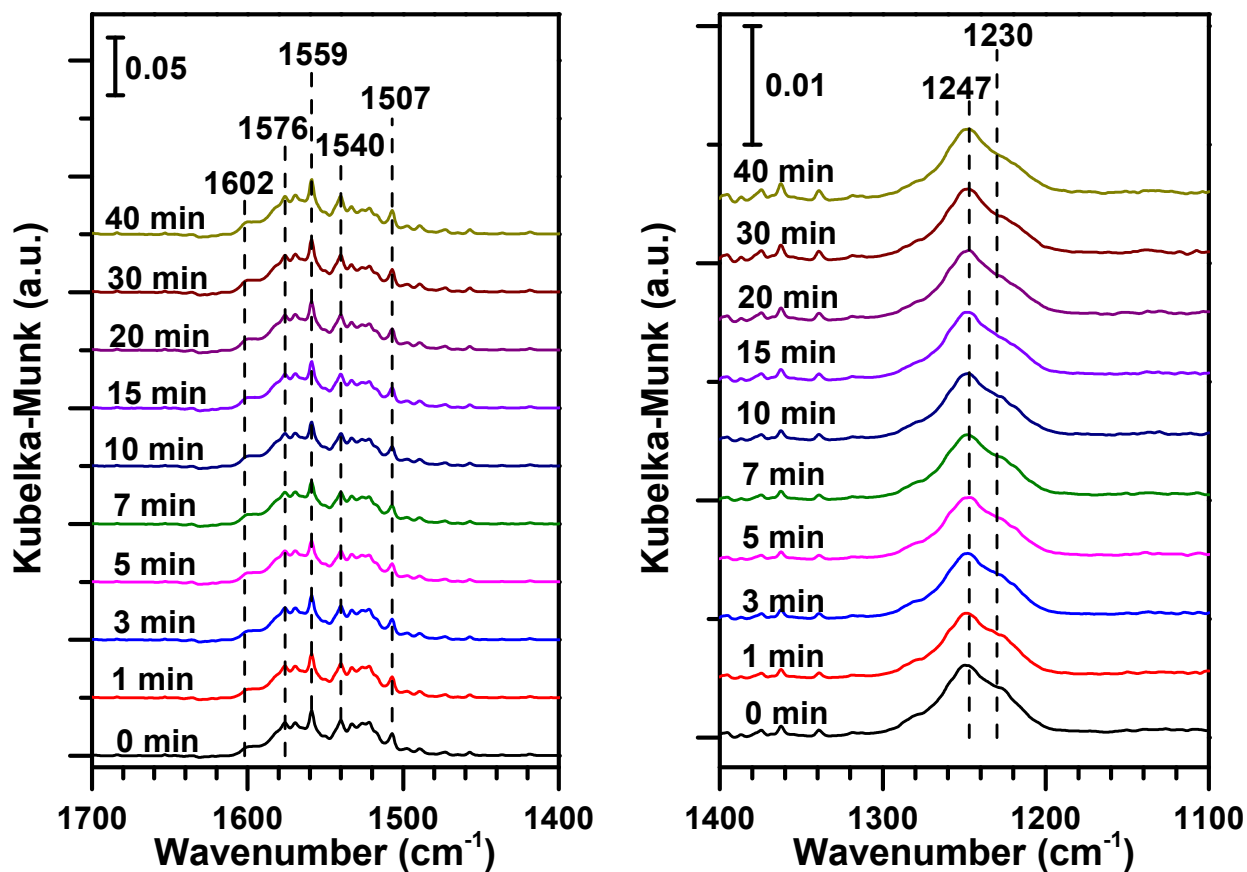

Figure S2. Time-resolved DRIFT spectra showing accumulation of surface species over 1Pd-5Cu/TiO<sub>2</sub> catalyst at 150 °C obtained following switch from 2000 ppm H<sub>2</sub> + 200 ppm NO + 1.5% O<sub>2</sub> to a flow containing 200 ppm NO + 1.5% O<sub>2</sub>.

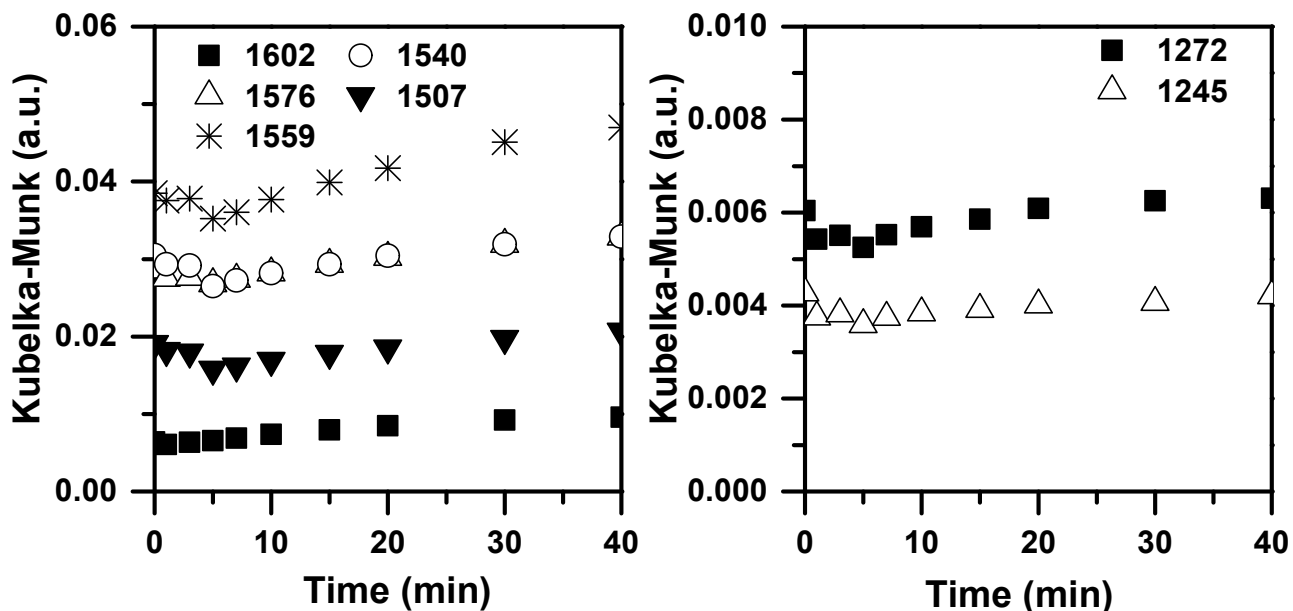

Figure S3. Evolution of IR height of the surface species over 1Pd-5Cu/TiO<sub>2</sub> catalyst obtained following switch from 2000 ppm H<sub>2</sub> + 200 ppm NO + 1.5 vol% O<sub>2</sub> to a flow containing 200 ppm NO + 1.5 vol% O<sub>2</sub>.

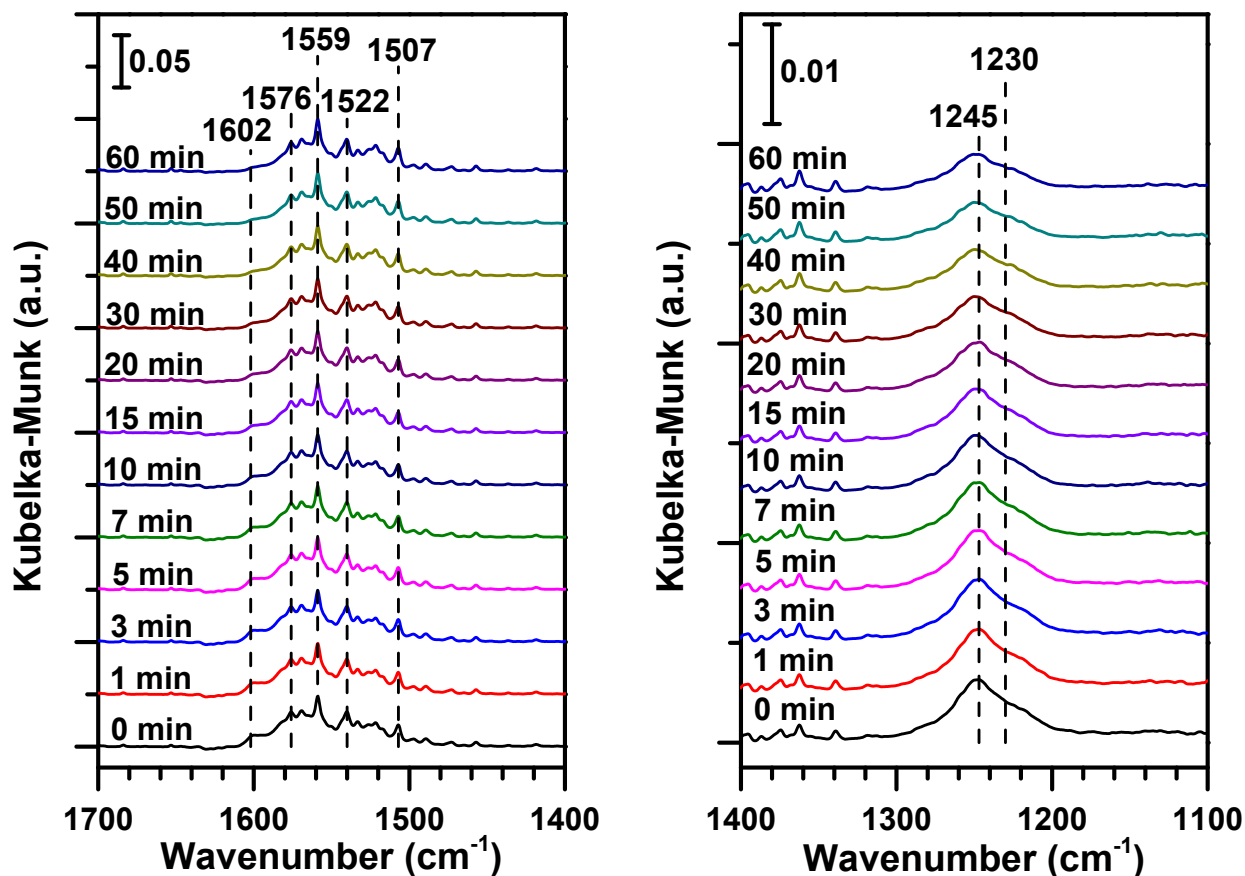

Figure S4. Time-resolved DRIFT spectra showing accumulation of surface species over 1Pd-5Cu/TiO<sub>2</sub> catalyst at 150 °C obtained following switch from 200 ppm NO + 1.5% O<sub>2</sub> to a flow containing 2000 ppm H<sub>2</sub> + 200 ppm NO + 1.5% O<sub>2</sub>.

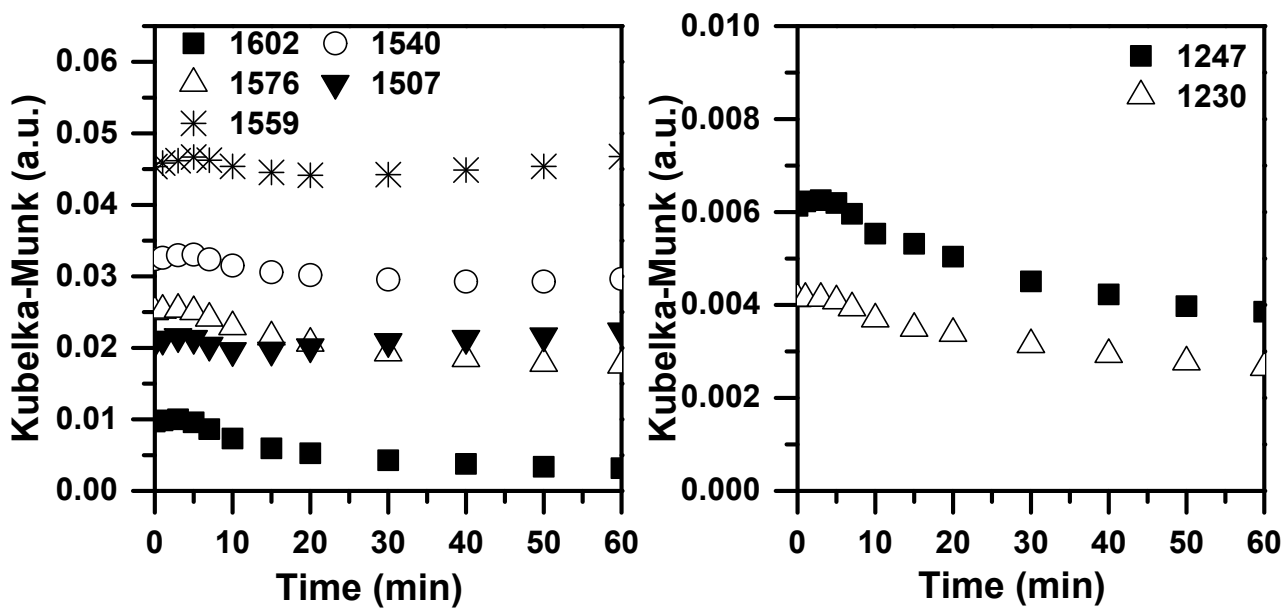

Figure S5. Evolution of IR height of the surface species over 1Pd-5Cu/TiO<sub>2</sub> catalyst obtained following switch from 200 ppm NO + 1.5 vol% O<sub>2</sub> to a flow containing 2000 ppm H<sub>2</sub> + 200 ppm NO + 1.5 vol% O<sub>2</sub>.
